# Supplementary material
Source: PubMed Central journal article supplement (PMC7533649)
Supplement: pnas.2004373117.sapp.pdf [file pnas.2004373117.sapp.pdf]

## SI Appendix

A CRISPR homing gene drive targeting a haplolethal gene removes resistance alleles and successfully spreads through a cage population

Jackson Champer<sup>1,2+\*</sup>, Emily Yang<sup>1,2+</sup>, Yoo Lim Lee<sup>1,2</sup>, Jingxian Liu<sup>1,2</sup>, Andrew G. Clark<sup>1,2</sup>, Philipp W. Messer<sup>1\*</sup>

<sup>1</sup>Department of Computational Biology, Cornell University, Ithaca, NY 14853

<sup>2</sup>Department of Molecular Biology and Genetics, Cornell University, Ithaca, NY 14853

+Equal contribution

\*Corresponding authors: JC (jc3248@cornell.edu), PWM (messer@cornell.edu)

## SI Methods

Intermediate for construction of the drive plasmid:

| <b>AHDr352v2il</b>    | <i>Template</i> | <i>Oligo/Enzyme 1</i> | <i>Oligo/Enzyme 2</i> |
|-----------------------|-----------------|-----------------------|-----------------------|
| <i>PCR Product</i>    | gRpL35AG2       | RpL35A2g_F            | RpL35A2g_R            |
| <i>Plasmid Digest</i> | pCFD4           | BbsI                  | none                  |

Intermediate for construction of the drive plasmid:

| <b>AHDr35Ni1</b>      | <i>Template</i> | <i>Oligo/Enzyme 1</i> | <i>Oligo/Enzyme 2</i> |
|-----------------------|-----------------|-----------------------|-----------------------|
| <i>PCR Product</i>    | Genomic DNA     | R35Left_F             | R35Left_R             |
| <i>PCR Product</i>    | gR35Left        | gR35Left_F            | gBlockLeft_R          |
| <i>Plasmid Digest</i> | BHDrN1*         | KpnI                  | XbaI                  |

\*Similar to previously constructed plasmid BHDrN1(1) for purposes of cloning in this study, but with the following sequence immediately 5' of the ApaI site sequence:

```
CACACTGTGTGTGACAGCTCGAGGCTCTCCGTC AATCAAGTTCAAGGGCGACACAAAATTTATCTAAATGCATAATAAACTACTGATAACATCTTAT
AGTTTGATTATATATTTTGTATTATCGTTGACATGTATAATTTTGATATCAAAAAGTATTTTCCCTTTATTATTTTCGAGATTATTTTCTTAATTC
TCTTTAACAACACTAGAAATATTGTATATACAAAAATCATAAATAATAGATGAATAGTTTAAATATAGGTGTTTCATCAATCGAAAAAGCAACGTATC
TTATTTAAAGTGCCTTGCTTTTTTCTCATTATAAGGTTAAATAATTCTCATATATCAAGCAAAGTGACAGGCGCCCTTAAATATTCTGACAAATGC
TCTTTCCCTAAACTCCCCCATAAAAAAACCCGCCGAAGCGGGTTTTTACGTTATTTGCGGATTAACGATTACTCGTTATCAGAACCGCCAGG
```

Intermediate for construction of the drive plasmid:

| <b>AHDr35N2</b>       | <i>Template</i> | <i>Oligo/Enzyme 1</i> | <i>Oligo/Enzyme 2</i> |
|-----------------------|-----------------|-----------------------|-----------------------|
| <i>PCR Product</i>    | AHDr35g2        | U61_2_U63_1_F         | R35_g2_R              |
| <i>PCR Product</i>    | Genomic DNA     | R35Right_F            | R35Right_R            |
| <i>Plasmid Digest</i> | AHDr35Ni1       | SpeI                  | DraIII                |

Intermediate for construction of the drive plasmid:

| <b>AHDr352</b>     | <i>Template</i> | <i>Oligo/Enzyme 1</i> | <i>Oligo/Enzyme 2</i> |
|--------------------|-----------------|-----------------------|-----------------------|
| <i>PCR Product</i> | AHDr35N2        | RA_1_F                | AHDr35_2_1_R          |
| <i>PCR Product</i> | AHDr35N2        | AHDr352_2_F           | RA_2_R                |
| <i>PCR Product</i> | AHDr35N2        | RA_3_F                | RA_3_R                |

Note: there are a larger number of previous intermediates for construction of our final drive plasmid because (i) we initially decided to utilize a split drive approach for greater safety after initial construction, and (ii) we decided to use more closely spaced gRNAs to maximize drive conversion efficiency (and use the more efficient tRNA expression system for gRNAs).

AHDr352 was injected with a similar mix to the drive in this study, but it yielded no transformants. We therefore used gRNAs that are more closely spaced to allow for homology-directed repair even if both sites were not cut (if only one site is cut, end resection must proceed to meet the other site before homology-directed repair can occur, which is a difficult process that reduces the efficiency of homology-directed repair, see a multiplex gRNA modeling study(2) for this as applies to homing drives – it is likely that initial injection and transformation with a donor plasmid has similar considerations).

Plasmid for assembly of the gRNAs used in the drive:

| <b>AHDr<sub>g</sub>2</b> | <i>Template</i> | <i>Oligo/Enzyme 1</i> | <i>Oligo/Enzyme 2</i> |
|--------------------------|-----------------|-----------------------|-----------------------|
| <i>PCR Product</i>       | pCFD3           | CFD5r35_1_F           | CFD_1_R               |
| <i>PCR Product</i>       | pCFD5           | CFDr35_12_F           | CFDr35_12_R           |
| <i>PCR Product</i>       | pCFD5           | CFD_2_F               | CFD5r35_2_R           |

Intermediate for construction of the drive plasmid:

| <b>AHDr352v2il</b> | <i>Template</i> | <i>Oligo/Enzyme 1</i> | <i>Oligo/Enzyme 2</i> |
|--------------------|-----------------|-----------------------|-----------------------|
| <i>PCR Product</i> | Genomic DNA     | R35Leftv2_F           | R35Leftv2_F           |
| <i>PCR Product</i> | AHDr352         | R35code_F             | R35code_R             |

Drive plasmid designed to incorporate the drive into the genome:

| <b>AHDr352v2</b>      | <i>Template</i>     | <i>Oligo/Enzyme 1</i> | <i>Oligo/Enzyme 2</i> |
|-----------------------|---------------------|-----------------------|-----------------------|
| <i>PCR Product</i>    | AHDr <sub>g</sub> 2 | U6_r_F                | U6_r_R                |
| <i>PCR Product</i>    | AHDr352             | R35Rightv2_F          | R35Rightv2_R          |
| <i>Plasmid Digest</i> | AHDr352v2il         | AgeI                  | DraIII                |

## Construction primers

AHDr35\_2\_1\_R: TGAATTAGATCCCGGGAGTAGGGAAAGTCAAACCGAA  
 AHDr352\_2\_F: TGACTTTCCCTACTCCCGGGATCTAATTCAATTAGAGACTAATTCAA  
 CFD\_1\_R: GGCTATGCGTTGTTTGTCTGTC  
 CFD\_2\_F: AACAGTAGGCAGAACAAACAACGC  
 CFD5r35\_1\_F: GTGCAGCGTTGCGTCTATGTCTACAGTTTTAGAGCTAGAAATAGCAAGTTAAA  
 CFD5r35\_2\_R: AAAACACGTAGAAGGATCCGTGCTCTGCATCGGCCGGGAATCGAAC  
 CFDr35\_12\_F: ATGCAGAGCACGGATCCTTCTACGTGTTTTAGAGCTAGAAATAGCAAGTTAAA  
 CFDr35\_12\_R: AAAACTGTAGACATAGACGCAACGCTGCACCAGCCGGGAATCGAAC  
 gBlockLeft\_R: CGAAAAGGGCCAGGAAGGAGCA  
 gR35Left\_F: AGGCGCCTAAGGCCGAGAAGC  
 R35\_g2\_R: TGGTCTCGGCCTTGTATGCATACGCATTAAGCGAACA  
 R35code\_F: GCACGGATCCTTCTATGTGGGCAAGCGCTGCGT  
 R35code\_R: AATTGAATTAGTCTCTAATTGAATTAGATCCCGGGAGTAGGGAAAGTCAAACCGAACAGC  
 R35Left\_F: ATTAACCAATTCTGAACATTATCGCCTAGGGTACCAACAGCACACTTTTCGAGCAACGGCG  
 R35Left\_R: AGGCGGCGGGCTTCTCGGCCTTAG  
 R35Leftv2\_F: ACCAATTAACCAATTCTGAACATTATCGCCTAGGGTACCAACAGCACACTTTTCGAGCAAC  
 R35Leftv2\_R: CAGCGCTTGCCACATAGAAGGATCCGTGCTCCTTG  
 R35Right\_F: TTAATGCGTATGCATACAAGGCCGAGACCAAGAAGTGC  
 R35Right\_R: GACGGAAGAGCCTCGAGCTGCACACACAGTGTCTCGGCTATAATTCTGACACATACCAAATG  
 R35Rightv2\_F: TTAATGCGTATGCATACAAGGCCGAGACCAAGAAG  
 R35Rightv2\_R: GATTGACGGAAGAGCCTCGAGCTGCACACACAGTGTCTCGGCTATAATTCTGACACATACCA  
 RA\_1\_F: ATTTATCAGCAATAAACCGCCA  
 RA\_2\_R: GAACAACTCTCAGGCTCCAG  
 RA\_3\_F: TTTTGCCTACCTGGAGCCTGA  
 RA\_3\_R: TTCCGGCTGGCTGGTTTATTG  
 RpL35A2g\_F: GGAAAGATATCCGGGTGAACTTCGCGTTGC  
 RpL35A2g\_R: CTTGCTATTTCTAGCTCTAAAACCCCTCAGAGGCTAA  
 U6\_r\_F: TTGTCCAAACTCATCAATGTATCTTAACCGGTGAGCTCTTTTTTGTCTACCTGTGATTGC  
 U6\_r\_R: TGGTCTCGGCCTTGTATGCATACGCATTAAGCGAACA  
 U61\_2\_U63\_1\_F: GTATGCTATACGAAGTTATAGAAGAGCACTAGTATTTTCAACGTCCTCGATAGTATAGT

## Sequencing primers (for confirming plasmid sequences)

pCFD5\_S\_R: ACGTCAACGGAAAACCATTGTCTA  
RpL35ALeft\_S\_F: GCATGCAAATGATCGAAACCCT  
RpL35ALeft\_S\_R: AGTGGACTTGGCTTGTGTGTC  
RpL35ARight\_S\_F: CGCATCCGCATCGTTAGTTCA  
RpL35ARight\_S\_R: TGCAGGTCAGTAATTC AAGTCGG  
RpL35ARight\_S2\_R: CGTTTCCATCGTCTTCATCTGC

## gBlocks

gR35Left:

AGGCGCCTAAGGCCGAGAAGCCCGCCGCTCCGAGGCCAAGGTGAGCGCCAAGAAGTATAAGCGCCATGGCCGCTG  
TTTGCCAAGGCCGTGTTTACGGGATATAAGCGCGCCTGCGCAATCAGCATGAGAATCAGGCCATTCTGAAGATCGA  
GGGAGCCCGCCGCAAGGAGCATGGCAGCTTTTATGTGGCAAGCGCTGCGTGTACGTGTATAAGGCCGAGACGAAGA  
AGTGCCTCCCCAGCACCCGGAGCGCAAGACGCGCGTGCAGCGCCGTGTGGGGAAAGGTGACGCGCATTTCATGGAAAT  
ACGGGAGCCGTCGCGCCCGCTTTAATCGCAATCTGCCGGGCCACGCCATGGGACATCGCATTTCGATTATGCTGTA  
TCCCAGCCGCATCTAAGTTAATATCCGACTTGAATTACTGACCTGCAGGAGTAAAAAATCCGTTTTACATTAAATGA  
AACACTTTAAATTTAATTAACGCAACTTGGCTTTTTTTATTAAGGCGAGATACCGATTGAAAGTTGACGGTAATCT  
GTATATCGATTGATGGCTGTTTCGGTTTGACTTTCCCTACTTCTAGACATGCTCCTTCCTGGCCCTTTTCGA

gRpL35AG2:

GGAAAGATATCCGGGTGAACTTCGCGTTGCGTCTATGTCTACAGTTTTAGAGCTAGAAATAGCAAGTTAAAATAAGG  
CTAGTCCGTTATCAACTTGAAAAAGTGGCACCGAGTCGGTGCTTTTTTGTCTACCTGTGATTGCTCCTACTCAAATA  
CAAAAACATCAAATTTTCTGTCAATAAAGCATATTTATTTATATTTATTTTACAGGAAAGAATTCCTTTTAAAGTGT  
ATTTTAACCTATAATGAAAAACGATTAAAAAAATACATAAAATAATTCGAAAATTTTGAATAGCCCAGGTTGATA  
AAAATTCATTTACATCGTTTTATAACTTATGCCCTAAGTATTTTTGACCATAGTGTTCATTTCTACATTAATTT  
TACAGAGTAGAATGAAACGCCACCTACTCAGCCAAGAGGCGAAAAGGTTAGCTCGCCAAGCAGAGAGGGGCCAGTG  
CTCACTACTTTTTATAATTCTCAACTTCTTTTTCCAGACTCAGTTCGTATATATAGACCTATTTTCAATTTAACGTC  
GGAAACTTTAGCCTCTGAGGGTTTTAGAGCTAGAAATAGCAAG

|          |                                                               |     |                             |
|----------|---------------------------------------------------------------|-----|-----------------------------|
| original | ATTGAGGGCGCCCGCCGCAAGGAGCACGGATCCTTCTACGTTGGGAAGCGTTGCGTCTAT  | 60  | first recoded codon         |
| recoded  | ATTGAGGGCGCCCGCCGCAAGGAGCACGGATCCTTCTATGTGGGAAGCGCTGTGTGTAC   | 60  |                             |
|          | *****                                                         |     |                             |
| original | GTCTACAAGGCCGAGACCAAGAAGTGCCTGCCACAGCATCCCGAGCGCAAGACCCGCGTC  | 120 |                             |
| recoded  | GTGTATAAGGCCGAGACGAAGAAGTGCCTGCCACAGCATCCCGAGCGCAAGACCGCGGTG  | 120 |                             |
|          | ** * * *****                                                  |     |                             |
| original | CGCGCTGTCTGGGGCAAGGTCACCCGCATCCACGGCAACACCGGCGCTGTGCGTGCCCGT  | 180 |                             |
| recoded  | CGCGCCGTGTGGGAAAGGTGACGCGCATTCATGGAAATACGGGAGCCGTCGCGCCCGC    | 180 |                             |
|          | *****                                                         |     |                             |
| original | TTCAACAGGAACCTGCCCGGTTCATGCCATGGGCCACCGCATCCGCATCATGCTGTACCCA | 240 | intron in original sequence |
| recoded  | TTTAATCGCAATCTGCCGGGCCACGCCATGGGACATCGCATTCGCATTATGCTGTATCCC  | 240 |                             |
|          | ** * * * * *****                                              |     |                             |
| original | TCAAGGATTTAA                                                  | 252 |                             |
| recoded  | AGCCGCATCTAA                                                  | 252 |                             |
|          | * * * * *                                                     |     |                             |

**FIGURE S1. Recoded *RpL35A* sequence alignment.** Alignment between the original *RpL35A* sequence (starting at exon 4, the second coding exon) and the recoded version is shown, with “\*” indicating an identical nucleotide. The locations of the first recoded codon and the last intron of the gene are also shown.

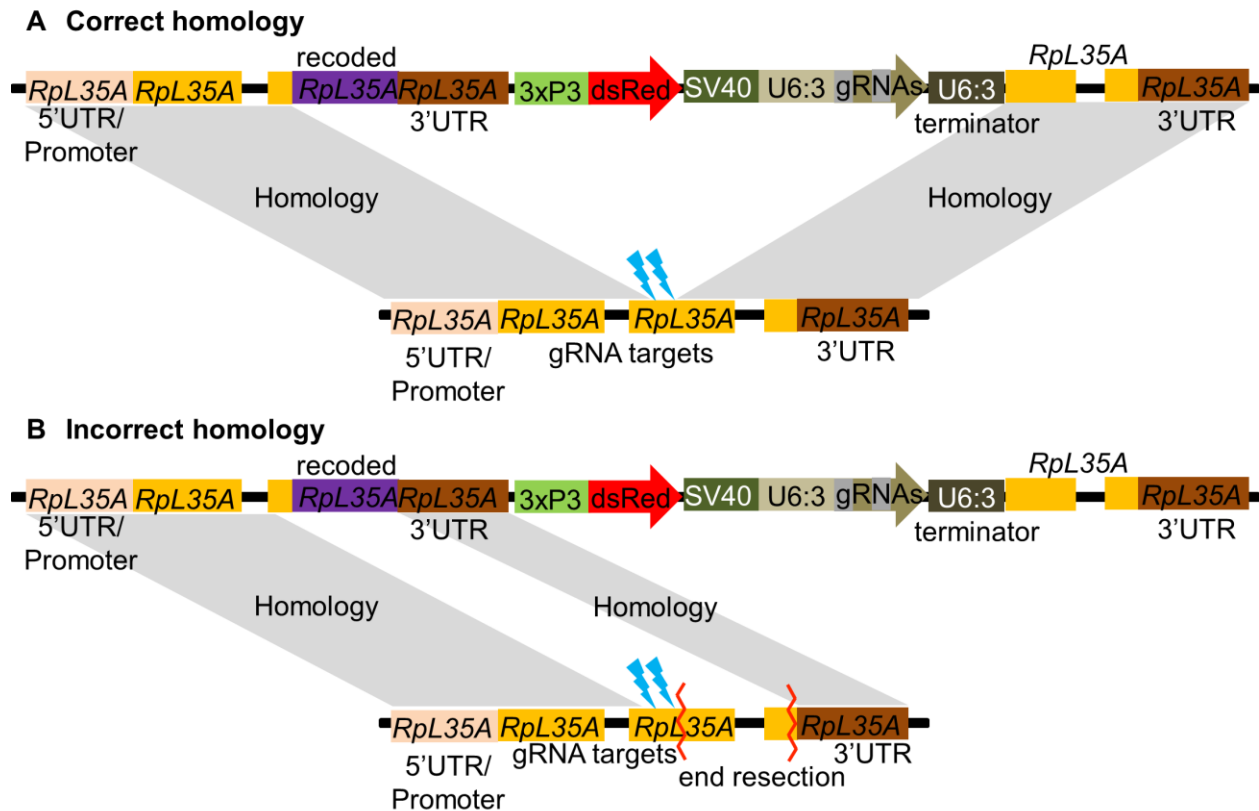

**FIGURE S2. Drive homology.** (A) The homology between the drive construct and wild-type allele during “correct” homology-directed repair that results in copying the entire drive allele. (B) During homology-directed repair, if the right side of the cut undergoes substantial end resection up to the 3’ UTR (red lines), a small region would have homology to the wrong end of the drive element, resulting in copying of only the recoded region (“incorrect” homology-directed repair), thus forming a functional r1 resistance allele. This was not observed in our study.

## References

1. Champer J, et al. (2018) Reducing resistance allele formation in CRISPR gene drive. *Proc Natl Acad Sci* 115(21):5522–5527.
2. Champer SE, et al. (2020) Computational and experimental performance of CRISPR homing gene drive strategies with multiplexed gRNAs. *Sci Adv* 6(10):eaaz0525.
